# Supplementary material for: Hydrothermal synthesis of a layered-type W–Ti–O mixed metal oxide and its solid acid activity
Source: Royal Society of Chemistry journal article supplement (doi:10.1039/c6cy02198k), 2016-11-29
Supplement: c6cy02198k1.pdf [file c6cy02198k1.pdf]

# Hydrothermal Synthesis of a Layered-type W-Ti-O Mixed Metal Oxide and its Solid Acid Activity

Toru Murayama<sup>1,2\*</sup>, Kiyotaka Nakajima<sup>2,3</sup>, Jun Hirata<sup>2</sup>, Kaori Omata<sup>2,5</sup>, Emiel J. M. Hensen<sup>4</sup>,  
Wataru Ueda<sup>2,6</sup>

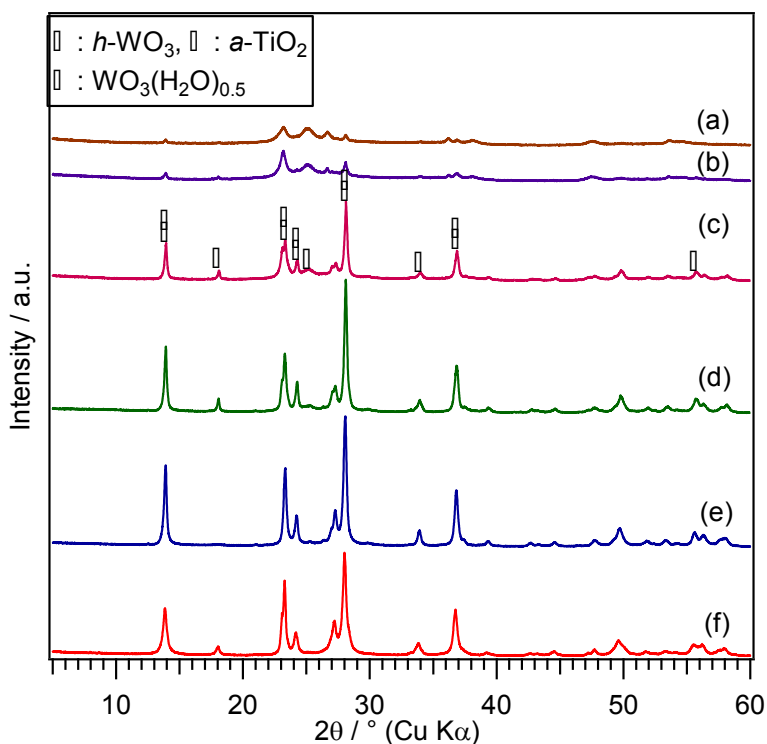

**Figure S1.** Effects of W / Ti ratio of the precursor on the XRD pattern of W-Ti-O samples. (W / Ti = (a) 3 / 2.84, (b) 3 / 2.13, (c) 3 / 1.42, (d) 3 / 0.711, (e) 3 / 0.5, (f) 3 / 0 (mmol / mmol) in 45 mL of precursor solution)

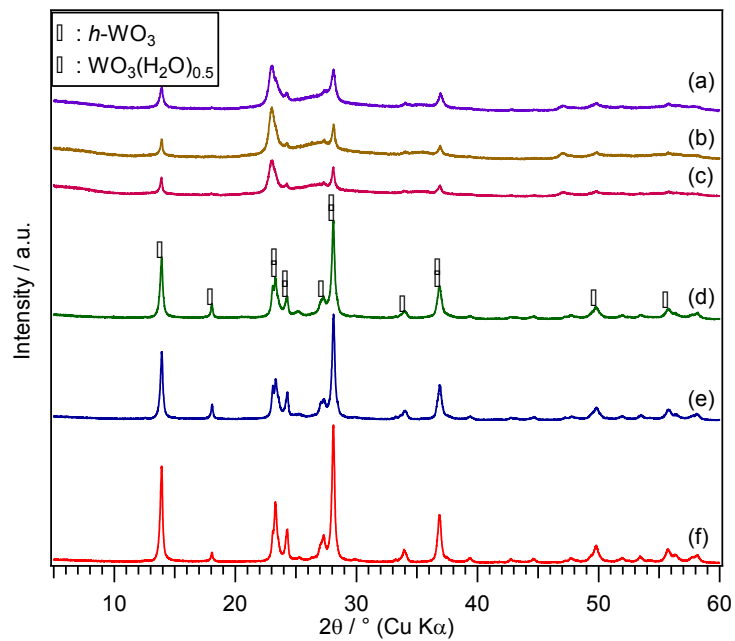

**Figure S2.** Effects of the amount of oxalic acid on the XRD pattern of W-Ti-O samples. (W / Ti = 3 / 0.711(mmol / mmol), amount of oxalic acid (a) 6 mmol, (b) 5 mmol, (c) 4 mmol, (d) 2 mmol, (e) 1 mmol, (f) 0 mmol in 45 mL of precursor solution)

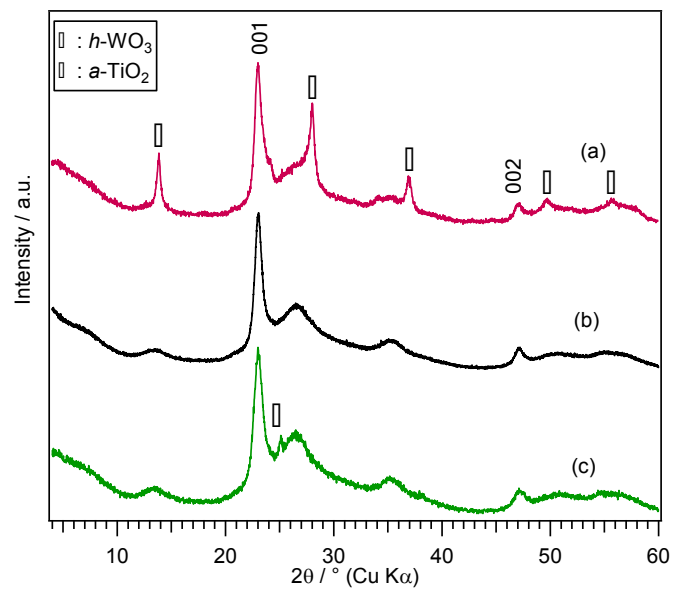

**Figure S3.** Effects of the ratio of W and Ti in the precursor solution on the XRD pattern of W-Ti-O samples. (W / Ti = (a) 5/1.10, (b) 5/ 1.27 and (c) 5/1.58 (mmol/mmol) with 5 mmol oxalic acid in 45 mL of precursor solution)

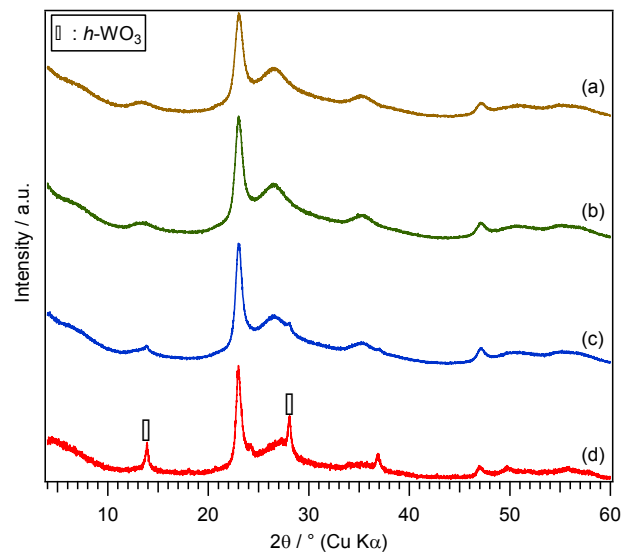

**Figure S4.** Effects of concentration of the precursor solution on the XRD pattern of W-Ti-O samples. (W / Ti = (a) 15 / 3.56, (b) 5 / 1.27, (c) 4 / 0.925, (d) 3 / 0.711 (mmol / mmol) with 5 mmol oxalic acid in 45 mL of precursor solution)

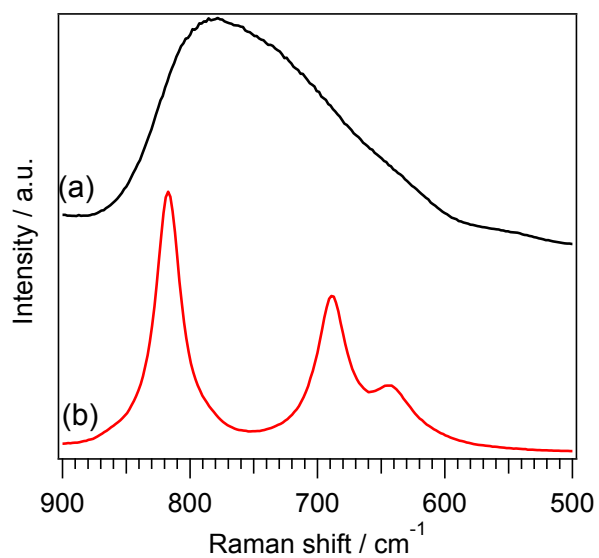

**Figure S5.** Raman spectra of a) layered-type W-Ti-O and b) hexagonal  $\text{WO}_3$ .

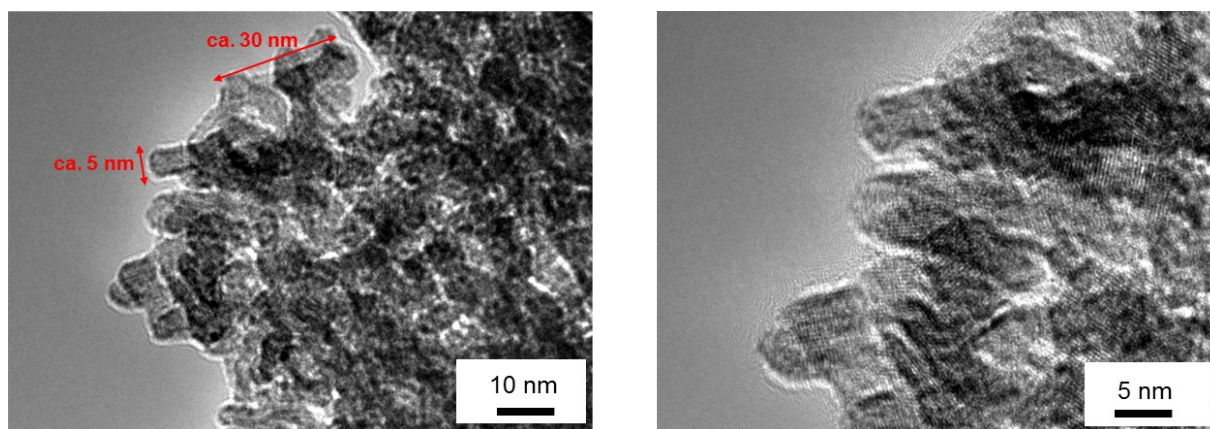

**Figure S6.** TEM images of the layered-type W-Ti-O catalyst. (Ratio of the precursor was W/ Ti= 5/ 1.27 (mmol/mmol) with oxalic acid (5 mmol).)

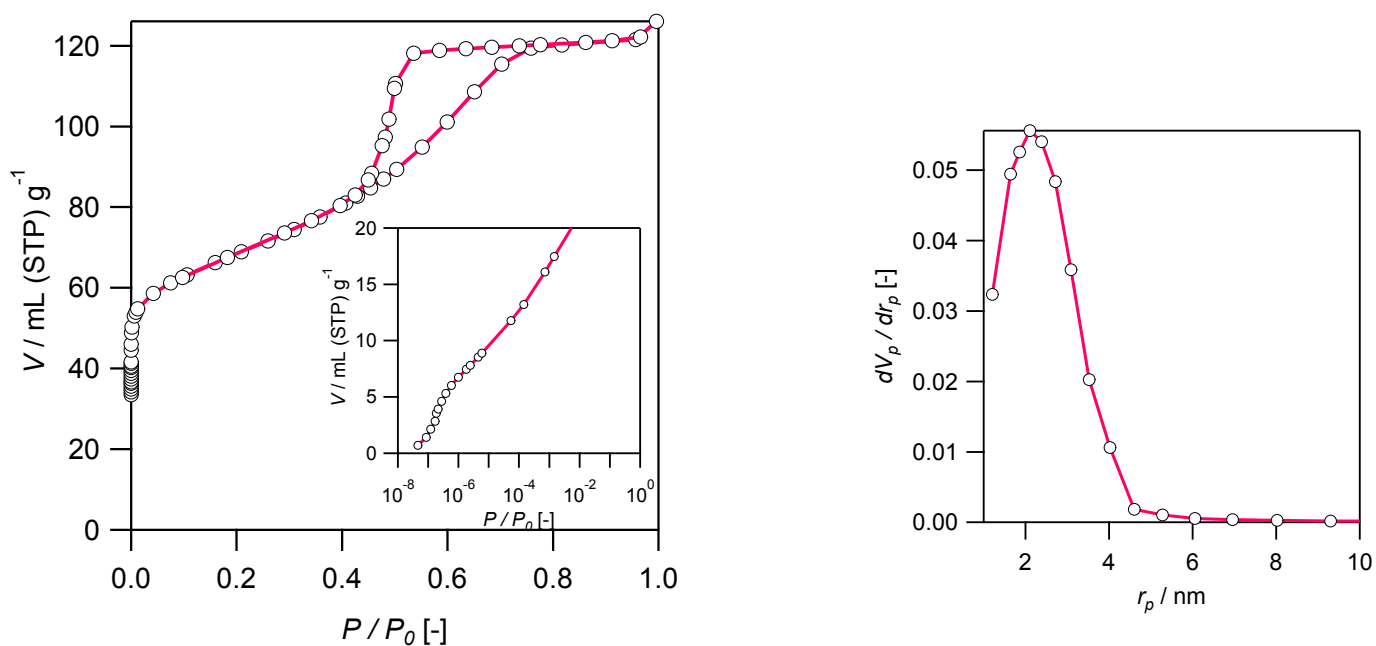

**Figure S7.** Nitrogen isotherm-adsorption of layered-type W-Ti-O and BJH plot. (Ratio of the precursor was W/ Ti= 5/ 1.27 (mmol/mmol) with oxalic acid (5 mmol) in 45 mL of precursor solution.)

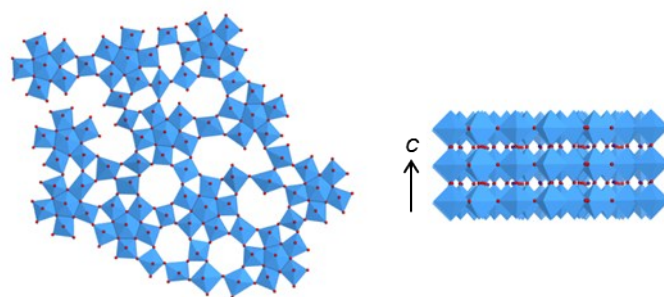

**Figure S8.** Structure model of the layered-type W-Ti-O sample.

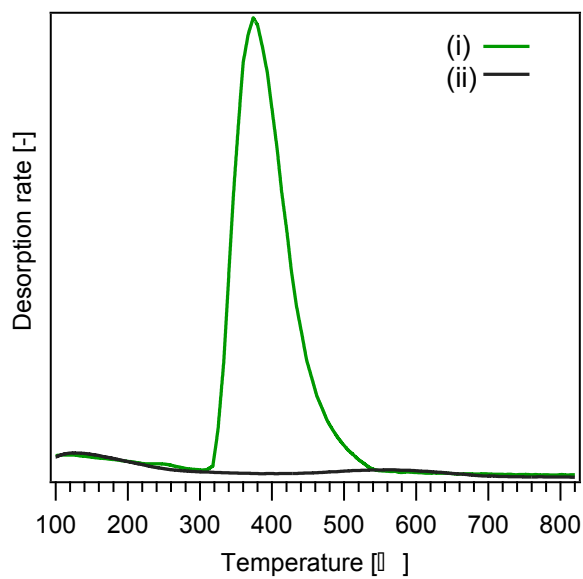

**Figure S9.** TPD spectra ( $m/z = 16$ ) of the layered-type W-Ti-O catalyst in He flow ((i) uncalcined sample and (ii) calcined at 400°C).

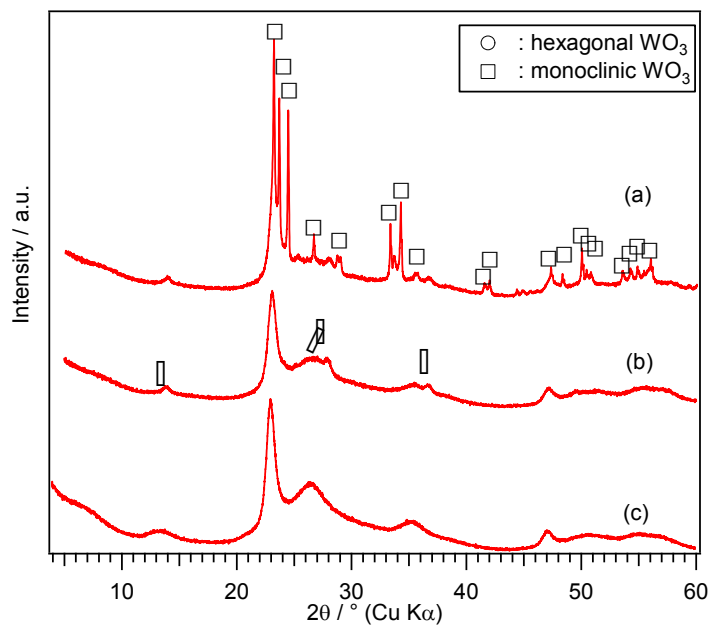

**Figure S10.** Effects of calcination temperature on the XRD pattern of W-Ti-O samples. ( (a) 400°C, (b) 500°C, (c) 600°C)

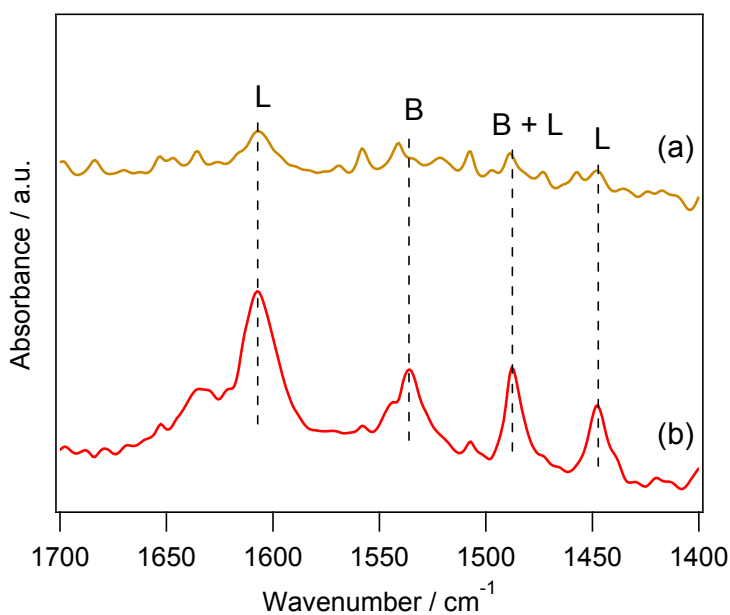

**Figure S11.** Pyridine-adsorbed FT-IR spectra desorbed at 350°C on (a) hexagonal W-Ti-O and (b) layered-type W-Ti-O catalyst.

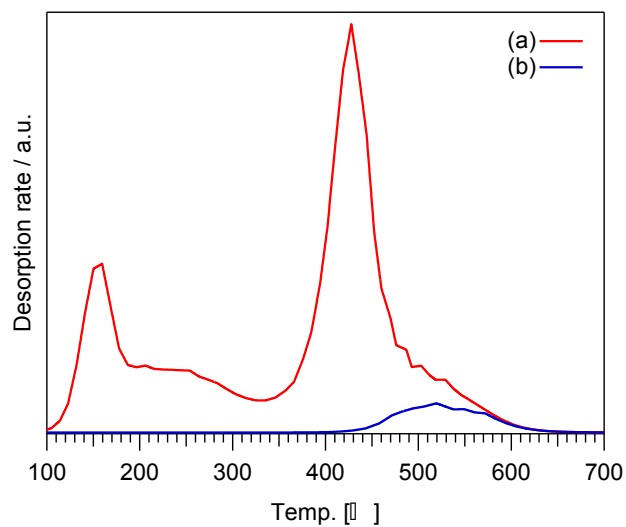

**Figure S12.** TPD spectra ( $m/z = 92$ ) of (a) the layered-type W-Ti-O catalyst used for alkylation of toluene and benzyl alcohol at 100°C for 3 h and (b) after calcination at 400°C of the W-Ti-O catalyst used.



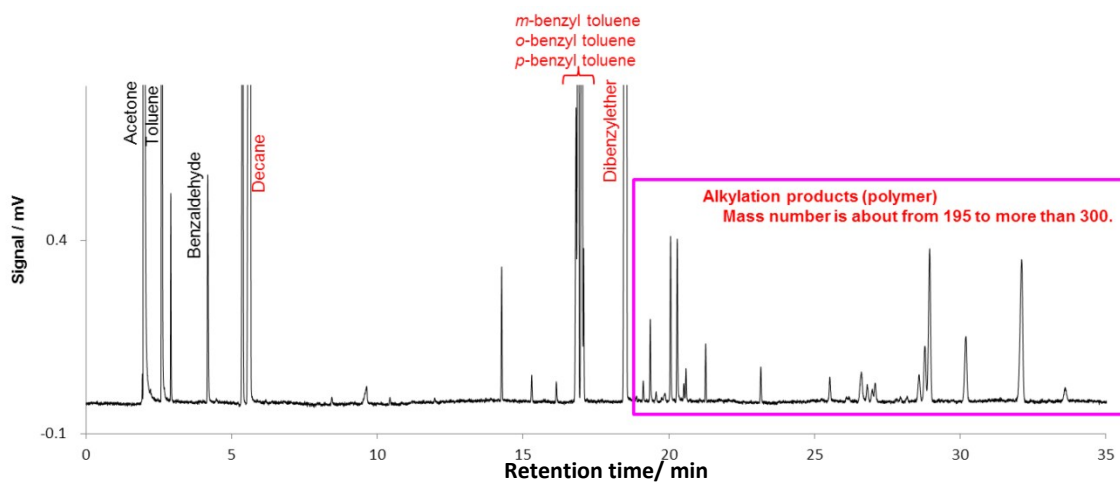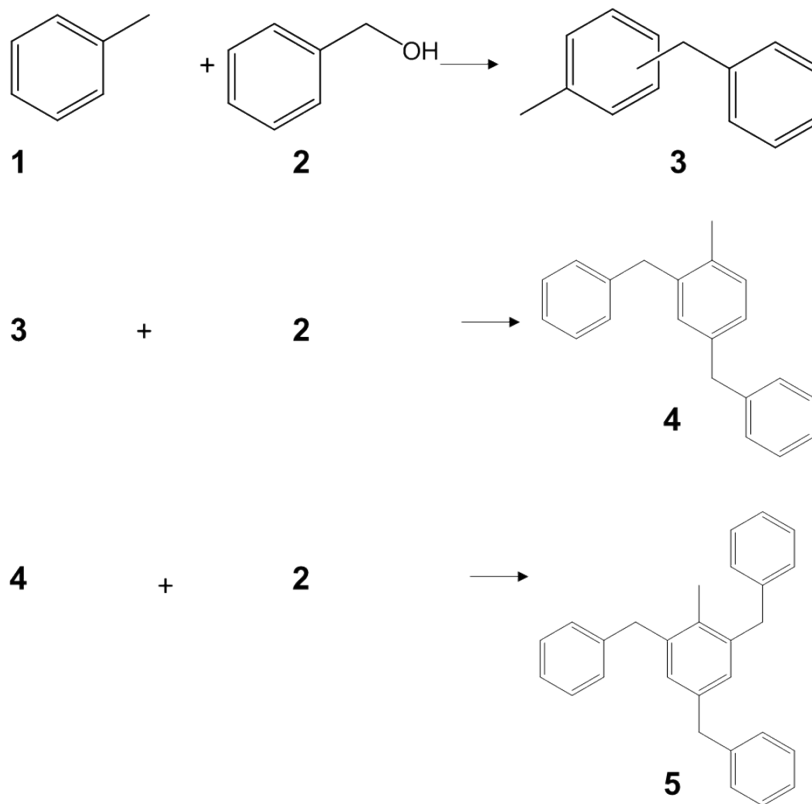

**Figure S13.** Chromatogram of alkylation products over the layered-type W-Ti-O catalyst. (1 toluene, 2 benzyl alcohol, 3 benzyltoluene, 4 dibenzyltoluene, 5 tribenzyltoluene)

**Table S1.** Catalytic activity over the layered-type W-Ti-O sample in the presence of water<sup>a</sup>.

| Reaction                                                                                                                                               | catalyst                                                                | Per weight                           | Reaction rate                                          |                                      |
|--------------------------------------------------------------------------------------------------------------------------------------------------------|-------------------------------------------------------------------------|--------------------------------------|--------------------------------------------------------|--------------------------------------|
|                                                                                                                                                        |                                                                         |                                      | Per acid amount                                        | Per surface area                     |
| $\text{CH}_3\text{COOC}_2\text{H}_5 + \text{H}_2\text{O} \rightarrow \text{CH}_3\text{COOH} + \text{C}_2\text{H}_5\text{OH}$<br>(catalyst 0.8 g, 60°C) |                                                                         | $\text{mmol g}^{-1} \text{min}^{-1}$ | $\text{mmol mmol}_{\text{-acid}}^{-1} \text{min}^{-1}$ | $\text{mmol m}^{-2} \text{min}^{-1}$ |
|                                                                                                                                                        | Layered-type W-Ti-O                                                     | 18.7                                 | 41.5                                                   | 0.17                                 |
|                                                                                                                                                        | ZSM-5                                                                   | 19.8                                 | 57.4                                                   | 0.06                                 |
|                                                                                                                                                        | $\text{WO}_3/\text{TiO}_2$                                              | 2.1                                  | -                                                      | -                                    |
|                                                                                                                                                        | $\text{Cs}_{2.5}\text{H}_{0.5}\text{PW}_{12}\text{O}_{40}$ <sup>b</sup> | 30.1                                 | 200.1                                                  | 1.9                                  |
|                                                                                                                                                        | $\text{SO}_4^{2-}/\text{ZrO}_2$ <sup>b</sup>                            | 25.5                                 | 25.5                                                   | 1.6                                  |
|                                                                                                                                                        | $\text{Nb}_2\text{O}_5$ <sup>b</sup>                                    | 4.0                                  | 12.9                                                   | 0.24                                 |
| 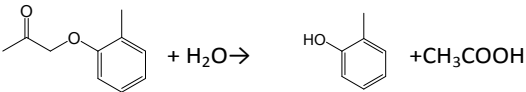<br>(catalyst 0.2 g, 60°C)                                            |                                                                         | $\text{mmol g}^{-1} \text{min}^{-1}$ | $\text{mmol mmol}_{\text{-acid}}^{-1} \text{min}^{-1}$ | $\text{mmol m}^{-2} \text{min}^{-1}$ |
|                                                                                                                                                        | Layered-type W-Ti-O                                                     | 8.3                                  | 18.4                                                   | $7.8 \times 10^{-2}$                 |
|                                                                                                                                                        | ZSM-5                                                                   | 0.3                                  | 0.87                                                   | $0.1 \times 10^{-2}$                 |
|                                                                                                                                                        | $\text{WO}_3/\text{TiO}_2$                                              | 3.3                                  | -                                                      | -                                    |
|                                                                                                                                                        | $\text{Cs}_{2.5}\text{H}_{0.5}\text{PW}_{12}\text{O}_{40}$ <sup>b</sup> | 10.7                                 | 71.3                                                   | 0.42                                 |
|                                                                                                                                                        | $\text{SO}_4^{2-}/\text{ZrO}_2$ <sup>b</sup>                            | 0.4                                  | 2                                                      | 0.02                                 |
|                                                                                                                                                        | $\text{Nb}_2\text{O}_5$ <sup>b</sup>                                    | 0.5                                  | 1.7                                                    | 0.02                                 |

<sup>a</sup> Details of reaction conditions are shown in the experimental section, <sup>b</sup> results from the reference [31] in the text.
